# Supplementary material for: Large-scale fabrication and Mo vacancy-induced robust room-temperature ferromagnetism of MoSe2 thin films
Source: Royal Society of Chemistry journal article supplement (doi:10.1039/d3nr00207a), 2023-01-01
Supplement: d3nr00207a1.pdf [file d3nr00207a1.pdf]

## Supporting Information

### Large-scale Fabrication and Mo Vacancy-induced Robust Room-temperature Ferromagnetism of MoSe<sub>2</sub> Thin Films

Jing Zhong,<sup>a</sup> Xi Zhang,<sup>a</sup> Wa He,<sup>b</sup> Dan Gong,<sup>a</sup> Mu Lan,<sup>c</sup> Xu Dai,<sup>a</sup> Yong Peng,<sup>b</sup> Gang Xiang<sup>\*a</sup>

<sup>a</sup> College of Physics, Sichuan University, Chengdu 610064, China

<sup>b</sup> College of Physical Science and Technology, Lanzhou University, Lanzhou 730000, China

<sup>c</sup> College of Optoelectronic Engineering, Chengdu University of Information Technology, Chengdu 610225, China

\*Corresponding emails: gxian@scu.edu.cn (G.X.)

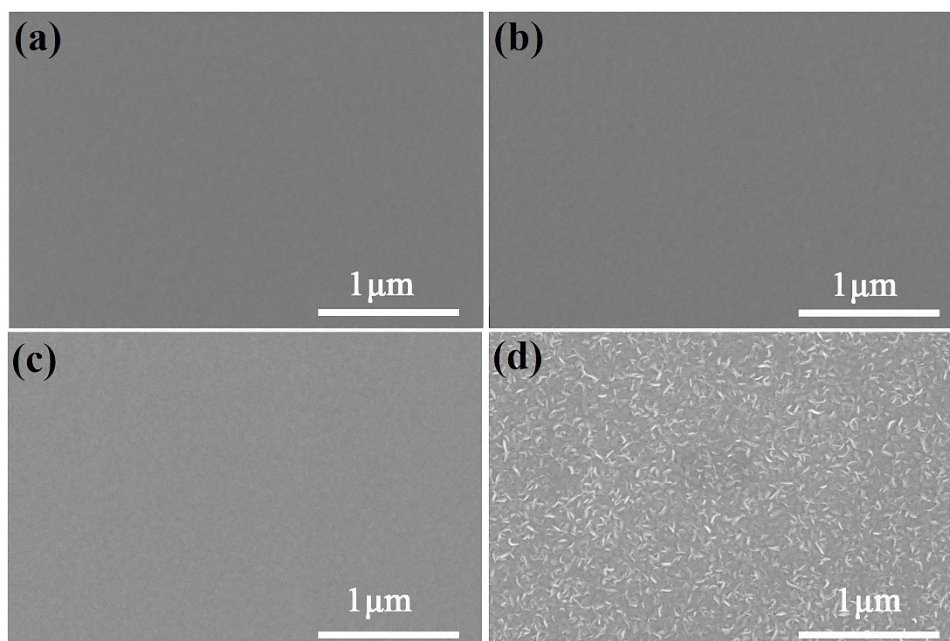

**Fig. S1.** SEM characterizations of the MoSe<sub>2</sub> thin films prepared at different temperatures. (a-d) The high-resolution top-view SEM images of the MoSe<sub>2</sub> thin films prepared at 770 °C (Z1), 800 °C (Z2), 850 °C (Z3) and 900 °C (Z4), respectively. (a) Z1, (b)Z2 and (c) Z3 all exhibit highly uniform smooth surface, while (d) Z4 displays evenly-distributed small willow leaf-like structures on the surface.

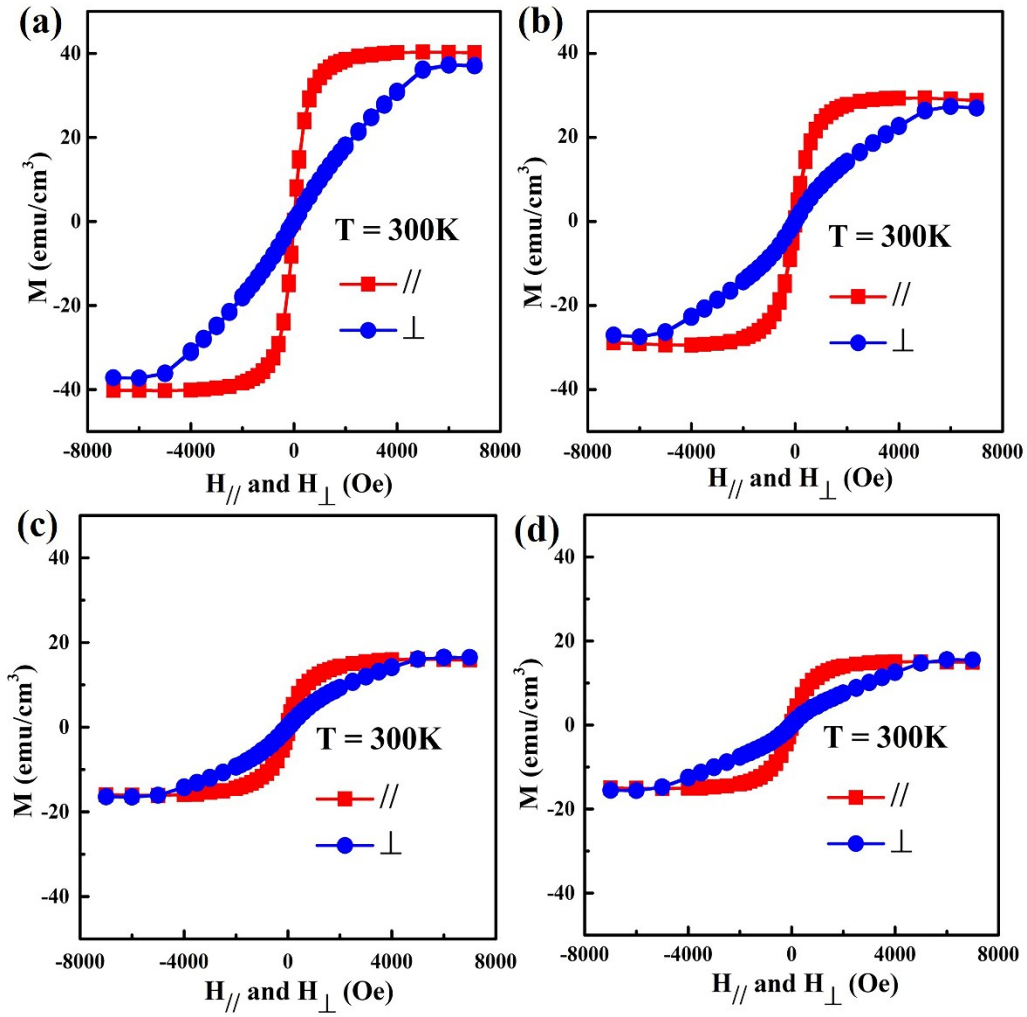

**Fig. S2.** Magnetic anisotropy of the MoSe<sub>2</sub> thin films prepared at different temperatures. (a-d) The  $M$  -  $H$  curves of Z1, Z2, Z3, and Z4 with  $H_{//}$  and  $H_{\perp}$  applied at 300 K, respectively, indicating that the magnetic anisotropy exists and the  $c$ -axis is the easy magnetization direction in the all the samples.
